# Supplementary material
Source: PubMed Central journal article supplement (PMC4195544)

## SUPPLEMENTARY DATA

Table S1. Sequences of the oligonucleotide primers used to get the PAC-V5-6xHis construct allowing the expression of the PAC-V5-6xHis recombinant protein.

| Primer                      | Orientation | Nucleotide sequence (5' → 3')                                |
|-----------------------------|-------------|--------------------------------------------------------------|
| <b>SP</b>                   | forward     | ATGGGTTTCATTGGTAAGAGTG                                       |
| <b>SP<sup>a</sup></b>       | reverse     | TAGACTACGGTTGAA <b>AGTGAAGACAGAGGA</b>                       |
| <b>PAC1<sup>a</sup></b>     | forward     | <b>TCCTCTGTCTTCAC</b> TTCAACCGTAGTCTA                        |
| <b>PAC2</b>                 | reverse     | TTTGGGGCAAGACGGGTAAAG                                        |
| <b>internal<sup>b</sup></b> | forward     | <b>GGAGATAGAACCATG</b> GGTTCATTGGTAAG                        |
| <b>internal<sup>c</sup></b> | reverse     | <b>CAAGAAAGCTGGGTCT</b> CAATGGTGATGGTGATG                    |
| <b>external<sup>b</sup></b> | forward     | GGGGACAAGTTTGTACAAAAAAGCAGGCTTCGA<br><b>AGGAGATAGAACCATG</b> |
| <b>external<sup>c</sup></b> | reverse     | GGGGACCACTTTGTAC <b>CAAGAAAGCTGGGTC</b>                      |

- Blue and black sequences are reverse complementary sequences spanning the SP and the PAC encoding sequences of AGP31 respectively, thus allowing the fusion of the two PCR fragments encoding the SP and the PAC domain respectively.
- Sequences common to internal and external forward oligonucleotide primers are in bold.
- Sequences common to internal and external reverse oligonucleotide primers are in bold.

Table S2. Commercial polysaccharides used for in vitro protein/polysaccharide interaction assays. These polysaccharides were purchased either from Sigma-Aldrich (Saint-Quentin Fallavier, France) or from Megazyme (Wicklow, Ireland).

| molecule                           | name             | origin              | reference                                       | properties                              | purity | carbohydrate content                                                                              |
|------------------------------------|------------------|---------------------|-------------------------------------------------|-----------------------------------------|--------|---------------------------------------------------------------------------------------------------|
| <b>pectins</b>                     |                  |                     |                                                 |                                         |        |                                                                                                   |
| polygalacturonic acid, sodium salt | citrus PGA       | citrus fruit        | Sigma-Aldrich P3850                             | nd                                      | ≥75%   | nd                                                                                                |
| polygalacturonic acid              | orange PGA       | orange              | Sigma-Aldrich P3889                             | nd                                      | ≥85%   | nd                                                                                                |
| polygalacturonic acid methyl ester | apple m.e.PGA    | apple               | Sigma-Aldrich 76282 (Fluka)                     | MW 30,000-100,000 70-75% esterification | >90%   | nd                                                                                                |
| polygalacturonic acid methyl ester | citrus m.e.PGA   | citrus peel         | Sigma-Aldrich 76280* (Fluka), replaced by P9135 | MW 30,000-100,000 ~60% esterification   | >90%   | nd                                                                                                |
| galactan                           | galactan         | potato              | Megazyme P-GALPOT                               | nd                                      | nd     | galactose 88%, arabinose 3%, rhamnose 3%, galacturonic acid 6%                                    |
| rhamnogalacturonan I               | RGI              | potato pectic fiber | Megazyme P-RHAM1                                | nd                                      | > 97%  | galacturonic acid 62%, rhamnose 20%, arabinose 3.3%, xylose 1%, galactose 12%, other sugars <1.7% |
| arabinogalactan                    | AG               | larch               | Megazyme P-ARGAL                                | nd                                      | > 95%  | galactose 81%, arabinose 14%, other sugars 5%                                                     |
| <b>hemicelluloses</b>              |                  |                     |                                                 |                                         |        |                                                                                                   |
| xyloglucan                         | XG               | tamarind seed       | Megazyme P-WYGLN                                | MW 202,000                              | > 97%  | xylose 38%, glucose 42%, galactose 16%, arabinose 4%                                              |
| β-glucan                           | β-glucan         | barley              | Megazyme P-BGBL                                 | MW 165,000                              | ~95%   | nd                                                                                                |
| xylan                              | birch wood xylan | birch wood          | Sigma-Aldrich X0502*                            | nd                                      | ≥90%   | xylose                                                                                            |
| xylan                              | beech wood xylan | beechwood           | Sigma-Aldrich X4252                             | nd                                      | >90%   | xylose                                                                                            |
| arabinoxylan                       | AX               | wheat               | Megazyme P-WAXYL                                | nd                                      | ~ 90%  | arabinose 37%, xylose 61%, other sugars 2%                                                        |
| <b>cellulose</b>                   |                  |                     |                                                 |                                         |        |                                                                                                   |
| cellulose                          | cellulose        | cotton              | Sigma-Aldrich C6413*                            | nd                                      |        | nd                                                                                                |

\* No longer available.

nd, not determined.

Table S3. Features common to proteins homologous to AGP31, in addition to the presence of a predicted signal peptide

| Protein name       | His stretch <sup>a</sup> | AGP motifs <sup>b</sup> | $\beta$ -Yariv <sup>c</sup> | X(P) <sub>n≥2</sub> X motifs | PAC domain <sup>d</sup> |
|--------------------|--------------------------|-------------------------|-----------------------------|------------------------------|-------------------------|
| <b>AtAGP31</b>     | +                        | +                       | +                           | +                            | +                       |
| <b>AtAGP30</b>     | -                        | +                       | +                           | +                            | +                       |
| <b>DcAGP1</b>      | +                        | ++                      | nd                          | +                            | +                       |
| <b>GhAGP31</b>     | +                        | +                       | nd                          | +                            | +                       |
| <b>TTS-1/TTS-2</b> | +                        | ++                      | +                           | +                            | +                       |
| <b>NaTTS</b>       | nd                       | nd                      | +                           | nd                           | nd                      |
| <b>PELPs</b>       | -                        | +                       | nd                          | +                            | +                       |
| <b>NaPRP4</b>      | + (4 His)                | +++                     | weak                        | +                            | +                       |
| <b>NaPRP5</b>      | + (3 His)                | - (ext)                 | -                           | +                            | +                       |
| <b>PvPRP1</b>      | +                        | +                       | nd                          | +                            | + (4)                   |
| <b>CaPRP1</b>      | + (3 His)                | +                       | nd                          | +                            | +                       |
| <b>PhPRP1</b>      | +                        | +                       | nd                          | +                            | +                       |

In the whole table, nd means not determined, + means presence and – absence.

a. The number of His residues is mentioned when the His stretch is very short.

b. Presence of at least one series of non-contiguous Pro residues in (XP)<sub>n</sub> motifs where X can be Ala, Ser or Thr. ++ means that such motifs are present both on the N- and C-sides of the His stretch. +++ means that a third AGP motif is found at the C-terminus of the Pro-rich domain. ext means that canonical extensin motifs (Ser-Pro<sub>n</sub>) are present at the N-terminus of the Pro-rich domain.

c. Precipitation or staining with the  $\beta$ -glucosyl Yariv reagent.

d. (4) means that only 4 instead of 6 conserved Cys residues are present.

References are given in the main text.

Fig. S1. Test of the polysaccharide array with specific monoclonal antibodies.

One  $\mu\text{L}$  (0.5  $\mu\text{L}$  for cellulose) of each polysaccharide solution was spotted on a nitrocellulose membrane: cell wall polysaccharide enriched-fractions from *A. thaliana* etiolated hypocotyls (pectins, hemicelluloses and cellulose) and commercial polysaccharides (citrus and orange PGA; apple and citrus m.e.PGA; XG;  $\beta$ -glucan; galactan; all at 1 mg/mL and RGI at 10 mg/mL). Specific monoclonal antibodies against PGA (JIM5), m.e.PGA (JIM7), XG (LM15) and galactan (LM5) were used. Secondary antibody coupled to alkaline phosphatase allowed signal detection. Interaction assays were carried out in duplicates.

As expected, JIM5 and JIM7 only gave a signal with the pectin-enriched cell wall fraction. LM15 gave the same signal with the hemicellulose- and cellulose-enriched cell wall fractions. This can be explained by the tight association between XG and cellulose microfibrils [1]. Finally, LM5 gave a weak signal with the pectin-enriched cell wall fraction and a stronger signal with the hemicellulose- than with the cellulose-enriched cell wall fraction. This was probably due to the fact that CDTA mainly extracted PGA. The same results were obtained with *B. distachyon* leaf cell wall fractions (not shown). Besides, JIM5 gave a signal with the commercial PGA and m.e.PGA. JIM7 only gave a signal with m.e.PGA. LM15 only gave a signal with XG and LM5 with galactan and RGI.

All these experiments allowed the characterization of the cell wall polysaccharide fractions and the validation of the polysaccharide array.

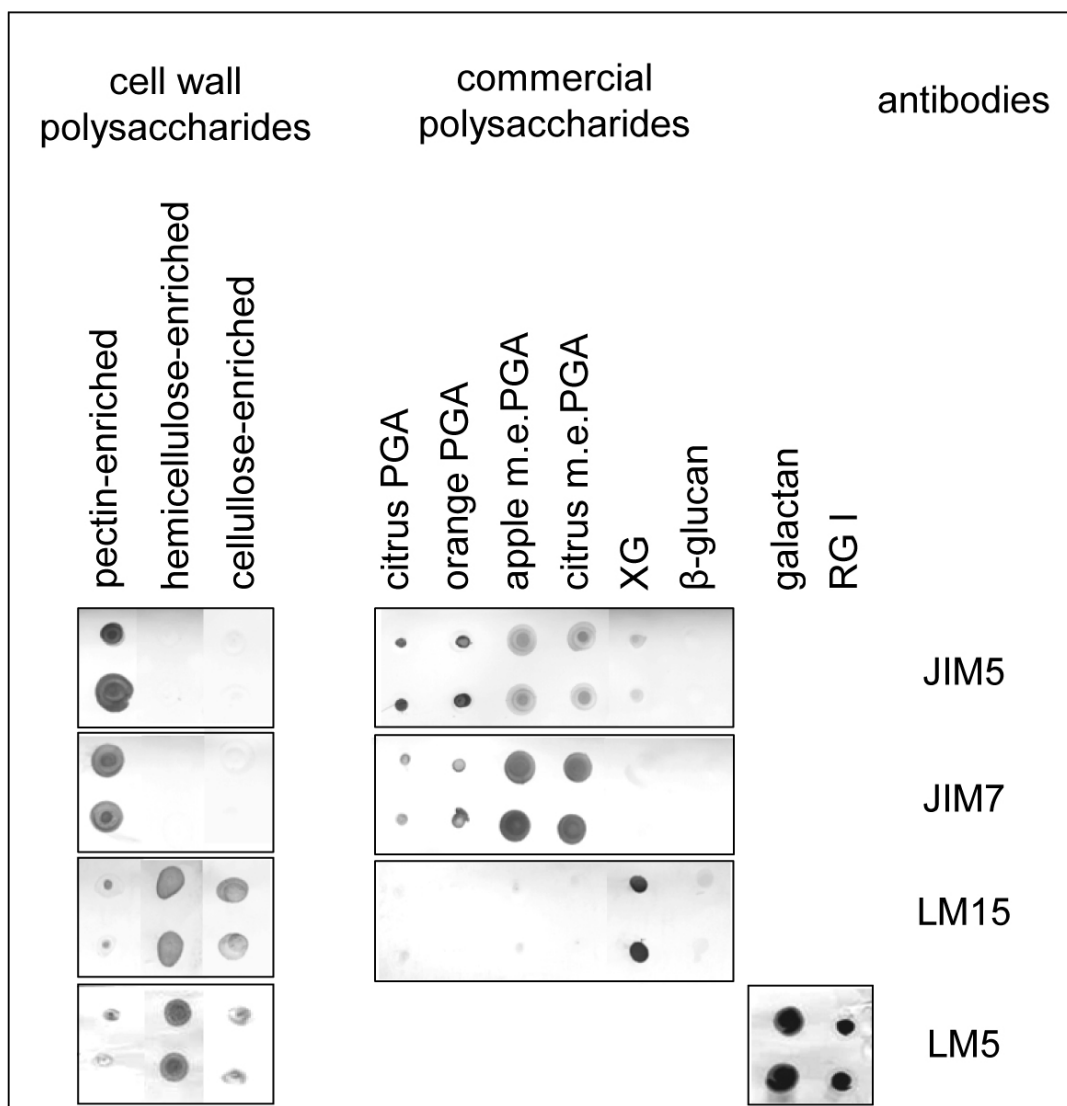

Supplement: supp_mcu038_mcu038supp.pdf [file supp_mcu038_mcu038supp.pdf]
